# Supplementary material
Source: PubMed Central journal article supplement (PMC4592873)
Supplement: AEM.01683-15_zam999116691so1.pdf [file AEM.01683-15_zam999116691so1.pdf]

# Identification of gene for a novel $\delta$ -hexachlorocyclohexane-metabolizing LinA-type3 dehydrochlorinase from metagenome of an HCH-contaminated soil

Nidhi Shrivastava,<sup>a,b</sup> Zbynek Prokop,<sup>c</sup> Ashwani Kumar<sup>a,b#</sup>

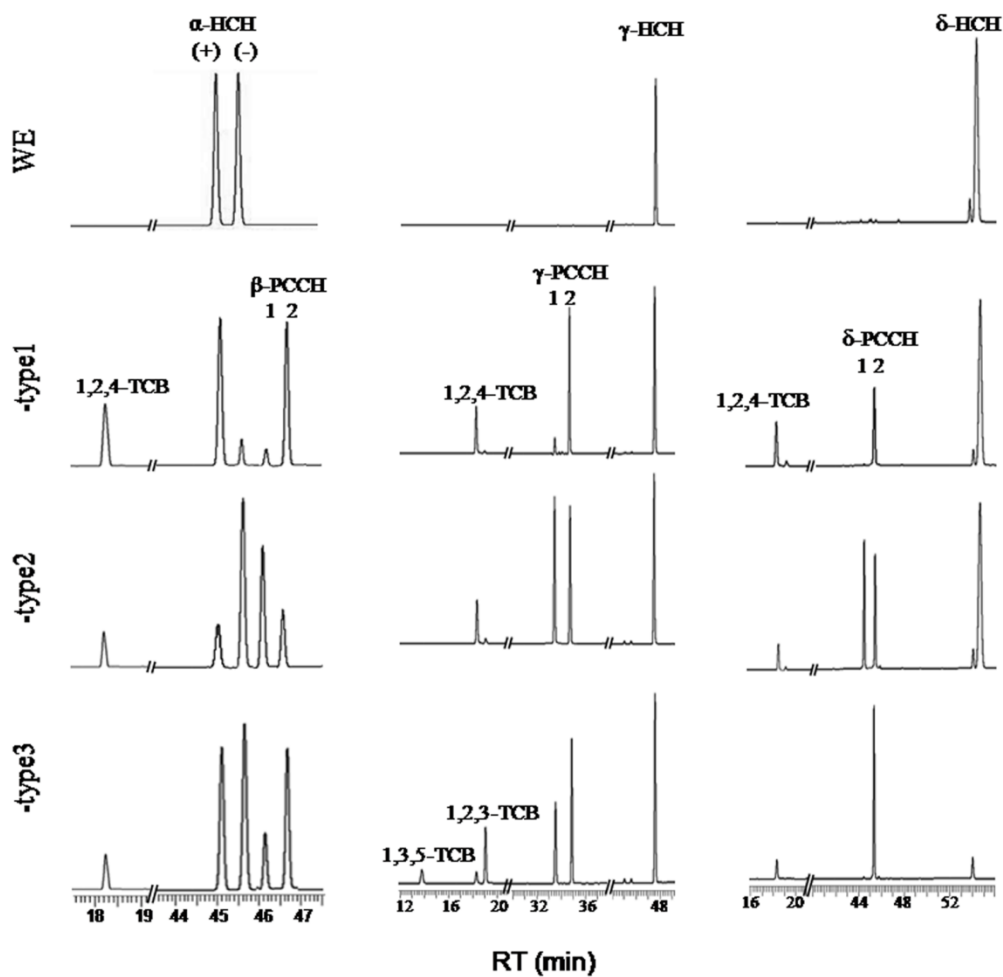

**FIG S1:** Gas chromatograms depicting enantioselective transformation of  $\alpha$ -HCH,  $\gamma$ -HCH and  $\delta$ -HCH by LinA-type1, -type2 and -type3. WE represents sample that were incubated without any enzyme in the reaction mixture.

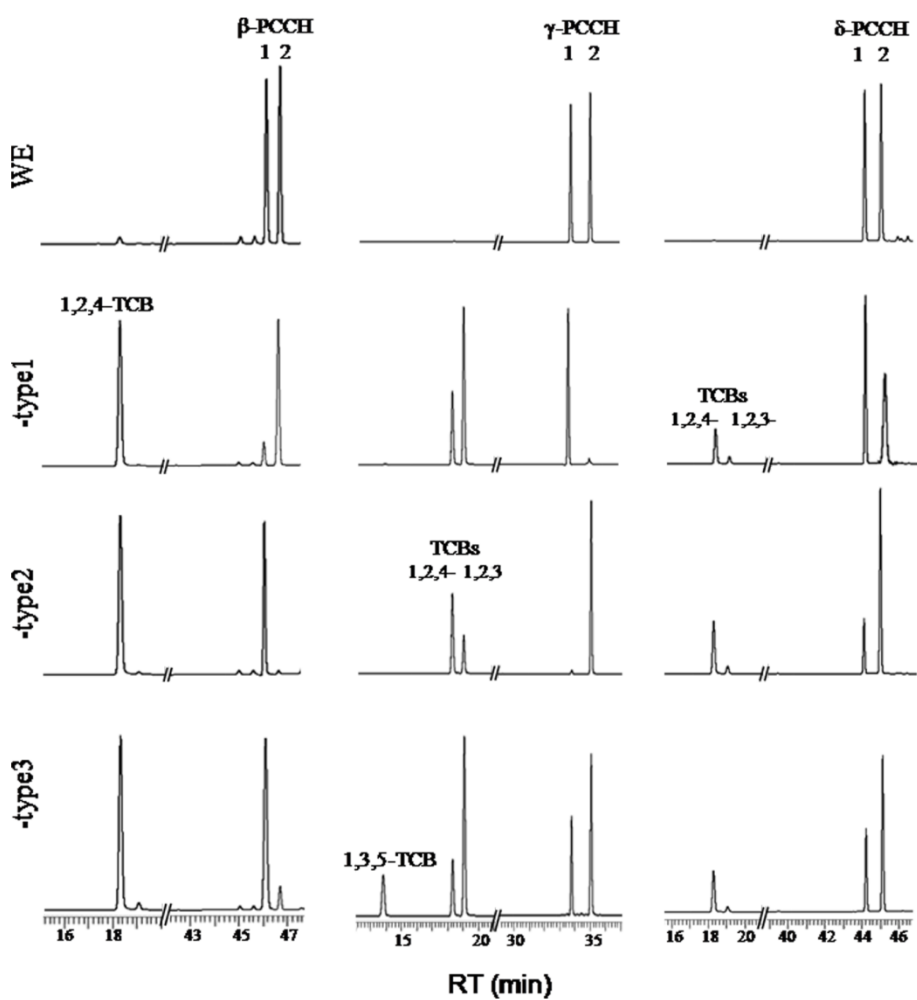

**FIG S2:** Gas chromatograms depicting enantioselective transformation of  $\alpha$ -PCCH,  $\gamma$ -PCCH and  $\delta$ -PCCH by LinA-type1, -type2 and -type3. WE represents sample that were incubated without any enzyme in the reaction mixture.

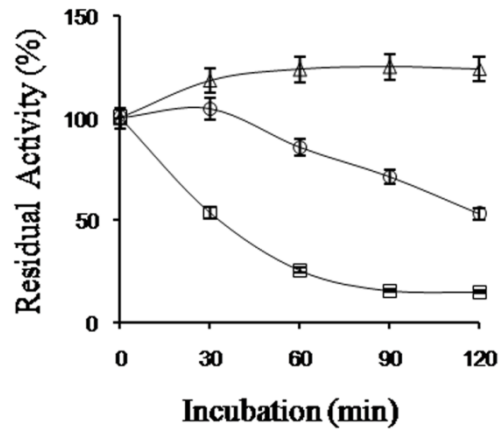

**FIG S3:** Residual activity of different LinA variants, after their pre-incubation at 60°C for 0-120 min. Symbols are LinA-type1 (square), LinA-type2 (triangle) and LinA-type3 (circle)

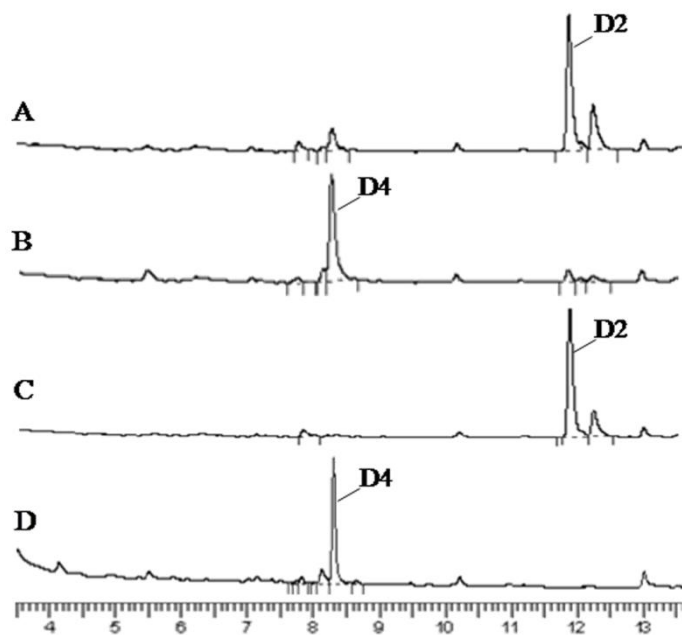

**FIG S4.** GC analysis of the metabolism of  $\delta$ -HCH by combination of LinA-type1 and LinB (A), by combination of LinA-type3 and LinB (B), and by LinB alone (C). Metabolism of  $\delta$ -PCCH by LinB alone is also shown (D).
